# Supplementary material for: Forest restoration by burning and gap cutting of voluntary set-asides yield distinct immediate effects on saproxylic beetles
Source: Springer Nature journal article supplement (doi:10.1007/s10531-017-1321-0), 2017-02-24
Supplement: MOESM1 [file 12091354]

**Supplemental material**

| **Table 5.** Results from the GLM analyses on rarefied species richness.‘Time’ refers to before/after the restoration treatment and ‘Treatment’ depicts the restoration treatment (burning, gap cutting or reference). Bold numbers highlight significant differences. | | | |
| --- | --- | --- | --- |
|  | Chi2 | Df | p |
|  |  |  |  |
| Time | 4.7026 | 1 | **0.0301** |
| Treatment | 17.5134 | 2 | **0.0001** |
| Time x Treatment | 12.2643 | 2 | **0.0022** |

**Figure 5**: Individual based rarefied species richness. As the sample with the least number of collected individuals contained 109 individuals, calculations of rarefied species richness were based on 109 individuals for all treatments. White bars show rarefied species richness prior to treatment and grey bars show rarefied species richness after treatment. Letters indicate differences between treatments within sampling year and stars indicate differences within treatments between sampling years. Error-bars depict standard error of the mean.
