# Supplementary material for: Forest restoration by burning and gap cutting of voluntary set-asides yield distinct immediate effects on saproxylic beetles
Source: Springer Nature journal article supplement (doi:10.1007/s10531-017-1321-0), 2017-02-24
Supplement: MOESM2 [file 12091354]

Appendix 1. List of species trapped and their abundance in the different stand types before and after treatment. Fire class indicates a species dependency upon forest fire according to Wikars (2006): ffc = fire favored, common, fd = fire dependent; nutritional subgroups: C = cambivores, F = fungivores, P = predators, W = wood borers and “?”indicate that the classification is uncertain; abundance patterns: burn= prescribed burn, ref = reference and gap = artificial gap cutting; After=after restoration treatment (2011), Before=before restoration treatment (2010) . Red-list class (after species name) are according to the Swedish red list according to Gärdenfors (2015); NT=near-treatened, VU= vulnerable

| **Species** | **Nutrition class** | **Fire class** | **burnAfter** | **burnBefore** | **refAfter** | **refBefore** | **gapAfter** | **gapBefore** | **Grand Total** |
| --- | --- | --- | --- | --- | --- | --- | --- | --- | --- |
| *Abdera affinis* | F |  |  |  |  | 2 |  |  | 2 |
| *Acidota crenata* | P |  |  | 40 |  | 39 |  | 18 | 97 |
| *Acmaeops septentrionis* (NT) | C,W | fd | 2 |  |  |  |  |  | 2 |
| *Acritus nigricornis* | P |  | 1 |  |  |  |  |  | 1 |
| *Acrulia inflata* | ?F |  |  | 4 | 2 | 2 | 1 | 5 | 14 |
| *Agathidium arcticum* | F |  |  |  | 1 |  |  |  | 1 |
| *Agathidium discoideum* (NT) | F |  |  |  | 1 |  |  |  | 1 |
| *Agathidium laevigatum* | F |  | 1 |  |  |  |  |  | 1 |
| *Agathidium mandibulare* | F |  |  | 2 | 1 | 5 | 1 | 9 | 18 |
| *Agathidium pallidum* | F |  |  | 1 | 11 | 5 | 1 |  | 18 |
| *Agathidium pisanum* | F |  | 3 | 13 | 11 | 11 | 3 | 21 | 62 |
| *Agathidium rotundatum* | F |  |  | 6 | 5 | 5 | 4 | 10 | 30 |
| *Agathidium seminulum* | F |  | 1 | 8 | 2 | 30 | 13 | 29 | 83 |
| *Aleochara sparsa* | P |  |  |  |  |  | 1 |  | 1 |
| *Ampedus balteatus* | P,W | ffc |  |  | 1 |  |  |  | 1 |
| *Ampedus nigrinus* | P,W |  | 1 | 5 | 3 | 11 | 2 | 10 | 32 |
| *Anaspis bohemica* | P |  |  | 2 |  | 1 |  | 2 | 5 |
| *Anaspis rufilabris* | P |  | 31 | 1 | 1 | 2 |  |  | 35 |
| *Anaspis thoracica* | F,W |  |  |  |  |  | 1 |  | 1 |
| *Anastrangalia reyi* | W |  |  |  |  |  |  | 1 | 1 |
| *Anisotoma axillaris* | F |  |  | 2 | 1 | 1 | 2 | 3 | 9 |
| *Anisotoma castanea* | F |  |  |  | 2 | 1 | 2 | 1 | 6 |
| *Anisotoma glabra* | F |  | 4 | 13 | 6 | 14 | 19 | 15 | 71 |
| *Anisotoma humeralis* | F |  |  | 5 |  |  |  | 1 | 6 |
| *Anomognathus cuspidatus* | D,P | ffc | 7 | 3 | 7 | 10 | 4 | 6 | 37 |
| *Anthophagus caraboides* | ?P |  |  |  | 1 |  |  |  | 1 |
| *Anthrenus museorum* | D |  | 2 |  |  |  | 1 |  | 3 |
| *Aplocnemus nigricornis* | P |  |  | 5 |  |  |  | 2 | 7 |
| *Asemum striatum* | C,W | ffc | 1 |  |  |  |  |  | 1 |
| *Aspidiphorus orbiculatus* | F |  |  |  |  | 2 |  | 1 | 3 |
| *Atheta allocera* | ?F,?D,P |  | 3 |  |  |  |  |  | 3 |
| *Atheta cinnamoptera* | ?F,?D,P |  |  |  | 1 |  |  |  | 1 |
| *Atheta crassicornis* | ?F,?D,P |  |  | 2 |  | 1 |  |  | 3 |
| *Atheta gagatina* | ?F,?D,P |  |  | 2 |  |  |  | 2 | 4 |
| *Atheta harwoodi* | ?F,?D,P |  | 3 | 7 |  | 8 |  | 6 | 24 |
| *Atheta intermedia* | ?F,?D,P |  | 1 | 1 | 1 |  | 1 |  | 4 |
| *Atheta myrmecobia* | ?F,?D,P |  | 8 |  |  | 2 | 4 |  | 14 |
| *Atheta nigripes* | ?F,?D,P |  | 1 |  |  |  |  |  | 1 |
| *Atheta procera* | ?F,?D,P |  |  |  | 1 |  |  | 1 | 2 |
| *Atheta sodalis* | F,?D, P |  |  |  |  | 1 |  | 1 | 2 |
| *Atheta subtilis* | ?F,?D,P |  | 6 |  | 5 |  | 1 | 1 | 13 |
| *Atheta taxiceroides* (NT) | ?F,?D,P |  |  |  | 1 |  |  |  | 1 |
| *Atheta vaga* | ?F,?D,P |  |  | 7 |  | 2 |  | 4 | 13 |
| *Athous subfuscus* | P |  | 2 | 7 | 2 | 13 | 1 | 6 | 31 |
| *Atomaria affinis*(NT) | F |  | 2 | 8 |  | 13 | 2 | 11 | 36 |
| *Atomaria alpina* (NT) | F |  | 4 | 1 |  | 2 | 1 | 4 | 12 |
| *Atomaria apicalis* | F |  |  |  |  |  |  | 1 | 1 |
| *Atomaria atrata* | F |  |  |  |  | 1 |  |  | 1 |
| *Atomaria bella* | F |  | 22 | 6 | 3 | 27 | 19 | 31 | 108 |
| *Atomaria bescidica* | F |  |  |  |  |  |  | 1 | 1 |
| *Atomaria fuscata* | F |  | 1 |  |  |  |  |  | 1 |
| *Atomaria lapponica*(NT) | F |  | 1 |  |  | 2 |  | 2 | 5 |
| *Atomaria longicornis* | F |  | 657 |  | 9 |  | 10 |  | 676 |
| *Atomaria ornata* | F |  | 1 | 9 |  | 4 | 3 | 8 | 25 |
| *Atomaria turgida* | F |  |  |  |  |  | 2 |  | 2 |
| *Atomaria vespertina* | F | ffc | 32 | 1 |  |  |  |  | 33 |
| *Atrecus affinis* | P |  | 1 | 7 | 3 | 12 | 2 | 7 | 32 |
| *Atrecus longiceps* | P |  |  |  |  | 2 |  |  | 2 |
| *Atrecus pilicornis* | P |  |  | 9 | 1 | 8 | 4 | 13 | 35 |
| *Autalia impressa* | ?F |  | 1 |  |  | 1 | 1 |  | 3 |
| *Bibloporus bicolor* | P |  | 4 | 21 | 8 | 34 | 4 | 29 | 100 |
| *Bisnius puella* | ?P |  |  | 2 |  | 1 | 1 | 5 | 9 |
| *Bolitochara mulsanti* | ?F |  |  |  |  |  |  | 1 | 1 |
| *Bolitochara pulchra* | ?F,F |  |  |  | 2 |  |  |  | 2 |
| *Bolitophagus reticulatus* | F |  |  | 1 |  |  |  | 1 | 2 |
| *Bryophacis rufus punctipennis* | ?P |  |  | 2 |  |  |  | 4 | 6 |
| *Buprestis rustica* | W |  | 1 |  |  |  |  |  | 1 |
| *Caenoscelis ferruginea* | F | ffc | 9 | 1 |  |  | 1 |  | 11 |
| *Carpophilus marginellus* | D |  | 1 |  |  |  |  |  | 1 |
| *Cartodere constricta* | F | ffc | 19 | 13 |  | 2 |  | 1 | 35 |
| *Cerylon deplanatum* | F |  |  | 2 | 1 | 1 | 1 | 1 | 6 |
| *Cerylon ferrugineum* | F |  | 25 | 50 | 51 | 73 | 36 | 64 | 299 |
| *Cerylon histeroides* | F |  | 33 | 64 | 55 | 95 | 31 | 128 | 406 |
| *Cis bidentatus* | F |  | 1 | 6 |  | 5 |  | 3 | 15 |
| *Cis boleti* | F |  | 31 | 13 | 6 | 13 | 2 | 10 | 75 |
| *Cis castaneus* | F |  |  |  |  | 2 |  | 5 | 7 |
| *Cis comptus* | F |  | 13 | 1 | 6 | 6 |  | 11 | 37 |
| *Cis dentatus* | F | ffc |  | 2 |  | 1 | 1 | 1 | 5 |
| *Cis glabratus* | F |  |  | 1 | 1 | 1 |  |  | 3 |
| *Cis jacquemartii* | F |  |  |  |  |  | 1 | 3 | 4 |
| *Cis lineatocribratus* | F |  | 2 | 6 |  | 10 | 3 | 4 | 25 |
| *Cis micans* | F |  |  | 5 |  | 8 | 1 | 15 | 29 |
| *Cis punctulatus* | F |  |  | 1 |  |  |  |  | 1 |
| *Cis quadridens* | F |  |  |  |  |  | 1 |  | 1 |
| *Corticaria elongata* | F |  |  |  | 1 |  |  |  | 1 |
| *Corticaria ferruginea* | F | ffc | 427 |  | 2 |  | 1 |  | 430 |
| *Corticaria interstitialis*(NT) | F |  | 3 | 1 | 1 | 1 | 5 | 2 | 13 |
| *Corticaria lapponica* | F |  |  | 1 |  | 6 | 2 | 3 | 12 |
| *Corticaria lateritia* | F |  |  |  |  | 2 |  |  | 2 |
| *Corticaria longicollis* | F |  |  | 1 |  |  |  |  | 1 |
| *Corticaria longicornis* | F |  | 3 | 4 | 1 | 1 |  | 2 | 11 |
| *Corticaria orbicollis* | F |  |  | 1 |  | 1 | 1 | 3 | 6 |
| *Corticaria polypori* (NT) | F |  |  |  |  | 1 |  | 1 | 2 |
| *Corticaria rubripes* | F | ffc | 333 | 9 | 13 | 9 | 46 | 22 | 432 |
| *Corticaria serrata* | F |  |  |  |  | 1 |  |  | 1 |
| *Corticarina latipennis* | F |  |  |  |  |  |  | 1 | 1 |
| *Corticeus linearis* | P |  | 2 |  |  |  |  | 1 | 3 |
| *Corticeus suturalis*(NT) | P |  | 1 |  |  |  |  |  | 1 |
| *Cortinicara gibbosa* | F | ffc | 8 |  |  |  |  |  | 8 |
| *Coryphium angusticolle* | D |  |  | 9 |  | 7 | 2 | 7 | 25 |
| *Cryphalus asperatus* | C |  |  |  |  | 1 |  |  | 1 |
| *Cryptolestes abietis* | P |  | 2 |  |  |  | 2 |  | 4 |
| *Cryptophagus confusus* | F |  | 2 |  | 1 | 2 | 1 |  | 6 |
| *Cryptophagus corticinus* | F | fd | 15 |  | 9 | 1 |  |  | 25 |
| *Cryptophagus dentatus* | F |  |  | 10 |  | 20 |  | 33 | 63 |
| *Cryptophagus lapponicus* | F |  | 117 | 535 | 223 | 432 | 246 | 819 | 2372 |
| *Cryptophagus quadrihamatus*(VU) | F |  |  |  |  |  | 1 | 1 | 2 |
| *Cryptophagus saginatus* | F |  |  | 1 |  |  |  |  | 1 |
| *Cryptophagus scanicus* | F |  | 1 | 2 |  | 6 | 1 | 3 | 13 |
| *Cryptophagus subdepressus* | F |  | 1 | 1 | 1 |  |  | 1 | 4 |
| *Cryptophagus tuberculosus* | F |  | 3 |  | 1 |  | 1 |  | 5 |
| *Crypturgus cinereus* | C |  |  |  |  |  |  | 1 | 1 |
| *Crypturgus pusillus* | C |  | 4 | 141 | 5 | 171 |  | 175 | 496 |
| *Crypturgus subcribrosus* | C |  | 11 | 2 | 3 | 3 | 15 | 2 | 36 |
| *Curtimorda maculosa* | F |  | 5 |  |  |  | 2 |  | 7 |
| *Dacne bipustulata* | F | ffc | 7 | 2 | 1 | 4 | 4 | 2 | 20 |
| *Dadobia immersa* | ?F |  | 2 |  |  |  |  |  | 2 |
| *Deliphrum tectum* | ?P |  |  | 1 |  | 2 | 1 | 3 | 7 |
| *Dendroctonus micans* | C |  |  |  | 1 | 1 |  | 1 | 3 |
| *Dendrophagus crenatus* | F |  |  | 14 | 6 | 20 | 3 | 10 | 53 |
| *Dendrophilus pygmaeus* | P |  |  |  |  | 1 |  |  | 1 |
| *Denticollis linearis* | P,W |  | 1 | 5 |  |  |  | 1 | 7 |
| *Diacanthous undulatus* | P,W |  |  | 6 | 1 | 1 |  | 1 | 9 |
| *Dictyoptera aurora* | P |  |  | 3 |  | 5 |  | 4 | 12 |
| *Dienerella filum* | F |  |  | 30 |  | 15 |  | 4 | 49 |
| *Dinaraea aequata* | ?F |  | 1 |  |  | 1 |  |  | 2 |
| *Dinaraea arcana* | ?F |  |  | 1 | 1 |  |  | 1 | 3 |
| *Dinaraea linearis* | ?F |  |  |  |  |  |  | 1 | 1 |
| *Dolichocis laricinus*(NT) | F |  | 1 | 4 |  | 4 | 2 | 3 | 14 |
| *Dorcatoma dresdensis* | F |  | 2 | 1 | 3 | 4 |  | 2 | 12 |
| *Dorcatoma robusta* | F |  | 1 | 4 |  | 2 | 1 | 1 | 9 |
| *Dromius agilis* | P |  | 2 | 2 | 3 | 6 | 1 | 1 | 15 |
| *Dropephylla linearis* | ?F,?P |  |  | 2 | 4 | 1 | 1 | 2 | 10 |
| *Dryocoetes autographus* | C |  | 44 | 105 | 20 | 121 | 112 | 130 | 532 |
| *Elateroides dermestoides* | W,F |  |  | 6 |  | 9 |  | 4 | 19 |
| *Enicmus apicalis*(NT) | F |  |  | 1 | 4 | 2 |  | 2 | 9 |
| *Enicmus fungicola* | F |  | 8 | 100 | 26 | 104 | 40 | 104 | 382 |
| *Enicmus planipennis*(NT) | F |  | 1 |  |  |  |  |  | 1 |
| *Enicmus rugosus* | F |  | 37 | 72 | 61 | 105 | 115 | 149 | 539 |
| *Ennearthron cornutum* | F |  | 1 |  |  |  | 1 | 1 | 3 |
| *Episernus angulicollis* | W |  | 1 | 4 |  |  |  |  | 5 |
| *Epuraea aestiva* | F |  |  |  |  | 6 |  | 6 | 12 |
| *Epuraea angustula* | F,P |  | 7 | 3 | 2 | 5 | 3 | 5 | 25 |
| *Epuraea binotata* | F |  | 116 | 1 | 2 |  | 21 | 1 | 141 |
| *Epuraea boreella* | F,P |  | 1 |  |  |  | 5 | 1 | 7 |
| *Epuraea contractula* | F |  |  |  |  |  |  | 1 | 1 |
| *Epuraea deubeli* | F,P |  | 17 |  |  |  | 1 |  | 18 |
| *Epuraea laeviuscula* | P |  | 3 | 2 | 2 |  |  | 1 | 8 |
| *Epuraea longipennis* | D,F |  |  | 1 |  |  |  |  | 1 |
| *Epuraea marseuli* | D,F |  | 2 |  |  |  | 3 | 4 | 9 |
| *Epuraea oblonga*(NT) | D,F |  |  |  | 1 |  |  |  | 1 |
| *Epuraea opalizans* | D,F |  |  |  |  |  | 1 |  | 1 |
| *Epuraea pallescens* | D,F |  |  | 1 |  | 1 |  |  | 2 |
| *Epuraea placida* | D,F |  | 1 |  |  |  | 4 |  | 5 |
| *Epuraea pygmaea* | D,F |  | 5 | 8 |  | 6 | 9 | 2 | 30 |
| *Epuraea rufomarginata* | F |  | 18 | 1 |  |  | 9 | 2 | 30 |
| *Epuraea silacea* | F |  | 9 | 47 | 4 | 50 | 15 | 52 | 177 |
| *Epuraea terminalis* | F |  |  |  |  | 5 |  |  | 5 |
| *Epuraea variegata* | F |  | 1 |  |  |  | 1 |  | 2 |
| *Ernobius explanatus* | W |  |  |  | 1 | 2 | 2 |  | 5 |
| *Euconnus claviger* | P |  |  |  |  |  | 2 | 1 | 3 |
| *Euconnus pragensis*(NT) | P |  |  |  |  |  | 4 |  | 4 |
| *Eudectus giraudi* | ?F |  | 1 | 9 | 4 | 7 | 4 | 62 | 87 |
| *Euplectus karstenii* | P |  | 3 | 8 | 18 | 10 | 19 | 7 | 65 |
| *Euplectus nanus* | P |  | 1 |  | 1 |  |  | 1 | 3 |
| *Euplectus piceus* | P |  |  | 1 | 4 | 5 | 1 | 3 | 14 |
| *Euplectus punctatus* | P |  | 39 | 72 | 59 | 88 | 55 | 81 | 394 |
| *Euplectus sanguineus* | P |  | 1 |  |  |  |  |  | 1 |
| *Euryusa castanoptera* | ?F |  | 1 | 7 | 1 | 5 | 2 | 4 | 20 |
| *Gabrius expectatus* | P |  | 25 | 12 | 6 | 23 | 10 | 41 | 117 |
| *Glischrochilus quadripunctatus* | F,P | ffc | 8 | 1 |  | 1 | 2 | 1 | 13 |
| *Gnathacmaeops pratensis* | C,W | ffc | 5 |  |  |  |  |  | 5 |
| *Gnathoncus buyssoni* | P |  |  |  |  | 1 |  | 1 | 2 |
| *Gyrophaena affinis* | F |  |  |  | 1 | 1 | 1 |  | 3 |
| *Hadreule elongatula* | F | ffc |  |  |  | 1 |  |  | 1 |
| *Hadrobregmus pertinax* | W |  | 2 | 3 | 1 | 1 |  | 1 | 8 |
| *Hallomenus binotatus* | F |  |  | 3 | 1 | 2 | 4 | 4 | 14 |
| *Haploglossa villosula* | ?F |  | 2 | 11 | 4 | 11 | 5 | 9 | 42 |
| *Henoticus serratus* | F | fd | 104 |  | 1 |  |  | 1 | 106 |
| *Holobus apicatus* | P |  |  |  | 1 |  |  |  | 1 |
| *Hylastes brunneus* | C |  |  |  |  |  |  | 2 | 2 |
| *Hylastes cunicularius* | C |  | 8 | 24 | 2 | 95 | 12 | 106 | 247 |
| *Hylobius abietis* | C,W | ffc | 7 |  |  |  | 1 |  | 8 |
| *Hylurgops glabratus* | C |  |  | 2 |  | 5 |  | 6 | 13 |
| *Hylurgops palliatus* | C |  |  | 1 |  |  |  |  | 1 |
| *Ips typographus* | C |  | 3 | 1 |  |  | 3 |  | 7 |
| *Ischnoglossa elegantula* | ?F |  |  | 4 | 3 | 7 |  | 12 | 26 |
| *Judolia sexmaculata* | C,W |  | 1 | 2 |  |  |  | 1 | 4 |
| *Latridius consimilis* | F |  |  |  |  |  |  | 1 | 1 |
| *Latridius gemellatus* | F |  |  |  | 1 |  |  |  | 1 |
| *Latridius hirtus* | F |  | 3 | 1 | 4 | 1 | 2 | 2 | 13 |
| *Leptophloeus alternans* | P |  | 1 |  |  |  | 2 |  | 3 |
| *Leptusa pulchella* | ?F |  |  | 1 |  | 3 |  | 5 | 9 |
| *Liotrichus affinis* | ? |  |  |  | 1 | 1 | 1 | 2 | 5 |
| *Litargus connexus* | F | ffc | 1 |  |  |  |  |  | 1 |
| *Lordithon lunulatus* | P |  |  | 4 | 4 | 10 | 3 | 27 | 48 |
| *Lordithon speciosus* | P |  |  | 7 | 3 | 3 | 2 | 14 | 29 |
| *Lordithon thoracicus* | P |  | 1 | 2 |  | 4 | 2 | 18 | 27 |
| *Lordithon trimaculatus* | P |  |  |  |  |  |  | 13 | 13 |
| *Lygistopterus sanguineus* | P |  |  | 3 |  |  |  |  | 3 |
| *Magdalis violacea* | C |  | 4 |  |  |  |  |  | 4 |
| *Malthodes brevicollis* | H,P |  |  | 1 | 2 | 2 | 1 |  | 6 |
| *Malthodes fuscus* | P |  | 1 | 1 | 1 | 4 | 2 | 1 | 10 |
| *Malthodes guttifer* | P |  |  |  | 1 |  |  | 1 | 2 |
| *Megasternum concinnum* | D,H,P |  | 2 |  |  |  | 3 |  | 5 |
| *Melanotus castanipes* | P,W |  |  | 8 | 8 | 8 | 1 | 11 | 36 |
| *Micrambe abietis* | F |  | 1 |  | 1 |  |  |  | 2 |
| *Micrambe longitarsis* | F |  | 1 |  | 1 |  | 1 |  | 3 |
| *Microscydmus minimus* | P |  |  |  | 1 | 1 |  | 1 | 3 |
| *Molorchus minor* | C,W |  |  |  |  |  | 1 |  | 1 |
| *Mycetochara flavipes* | ? |  | 2 | 1 | 1 | 1 |  | 1 | 6 |
| *Mycetochara obscura* | ? |  |  | 3 | 5 | 6 | 1 | 5 | 20 |
| *Mycetophagus fulvicollis*(NT) | F |  |  | 1 | 1 |  |  | 1 | 3 |
| *Mycetophagus multipunctatus* | F |  |  |  |  |  |  | 1 | 1 |
| *Mycetophagus populi* | F |  |  | 1 |  | 2 |  |  | 3 |
| *Mycetoporus maerkelii* | P |  |  | 1 |  | 4 | 2 |  | 7 |
| *Neuraphes perssoni* (VU) | P |  |  |  | 1 | 1 |  | 2 | 4 |
| *Nudobius lentus* | P |  |  |  |  |  | 1 |  | 1 |
| *Omalium caesum* | ?P |  | 4 |  |  |  |  |  | 4 |
| *Omalium rivulare* | ?P |  | 1 |  |  |  |  |  | 1 |
| *Orchesia fasciata*(NT) | F |  |  | 1 |  | 1 |  |  | 2 |
| *Orchesia micans* | F |  |  | 2 | 2 | 4 | 2 | 2 | 12 |
| *Orthocis alni* | F |  |  | 4 | 1 | 6 | 1 | 4 | 16 |
| *Orthocis linearis* | F |  |  |  |  | 1 | 1 | 1 | 3 |
| *Orthoperus atomus* | F |  |  | 2 | 1 |  |  |  | 3 |
| *Orthoperus brunnipes* | P |  |  | 1 |  |  |  |  | 1 |
| *Orthoperus corticalis* | F |  |  | 1 |  | 1 |  |  | 2 |
| *Orthoperus nigrescens* | F |  |  |  |  | 2 |  |  | 2 |
| *Orthoperus punctatus* | F |  |  | 1 | 1 |  |  |  | 2 |
| *Orthotomicus suturalis* | C | ffc | 11 |  |  |  | 1 |  | 12 |
| *Oxymirus cursor* | W |  |  | 1 |  | 1 |  |  | 2 |
| *Oxypoda alternans* | ?F |  | 1 | 3 |  | 1 | 4 | 6 | 15 |
| *Oxypoda skalitzkyi* | ?F |  |  |  | 2 |  |  |  | 2 |
| *Oxypoda soror* | ?F |  |  |  | 2 |  |  |  | 2 |
| *Paranopleta inhabilis* | C | fd | 1 |  |  |  | 2 |  | 3 |
| *Paraphotistus impressus* | P |  |  | 1 | 2 | 1 |  | 1 | 5 |
| *Pediacus fuscus* | F | ffc | 1 |  |  |  |  |  | 1 |
| *Peltis ferruginea* | F |  |  | 5 |  | 3 |  | 8 | 16 |
| *Philonthus decorus* | ?P |  |  |  |  |  |  | 1 | 1 |
| *Philonthus marginatus* | ?P |  |  | 1 |  |  |  |  | 1 |
| *Phloeonomus pusillus* | P | ffc | 22 | 1 | 3 | 2 | 9 | 4 | 41 |
| *Phloeonomus sjoebergi* | ?P |  | 8 | 2 | 4 |  | 6 | 2 | 22 |
| *Phloeopora concolor* | P |  | 5 |  |  |  | 1 |  | 6 |
| *Phloeopora corticalis* | ?P |  |  |  |  |  | 1 | 3 | 4 |
| *Phloeostiba lapponica* | P | ffc | 255 | 6 | 5 | 1 | 5 |  | 272 |
| *Phloeostiba plana* | ?P |  | 29 |  | 1 | 2 | 1 | 1 | 34 |
| *Phloeotribus spinulosus* | C |  |  | 6 |  | 3 |  | 2 | 11 |
| *Phyllodrepa melanocephala* | ?F,?P |  | 7 | 3 | 4 | 5 | 3 | 1 | 23 |
| *Phyllodrepa nigra* | ?F |  |  |  |  |  |  | 1 | 1 |
| *Phymatura brevicollis*(VU) | ?P |  |  |  |  |  | 2 |  | 2 |
| *Pissodes gyllenhalii* | C |  | 2 |  |  |  |  | 1 | 3 |
| *Pityogenes bidentatus* | C |  | 28 |  |  |  | 12 |  | 40 |
| *Pityogenes chalcographus* | C |  | 1444 |  | 7 | 2 | 102 | 2 | 1557 |
| *Pityogenes quadridens* | C |  | 9 |  |  |  | 2 |  | 11 |
| *Pityophagus ferrugineus* | P |  | 5 |  |  | 2 | 2 | 2 | 11 |
| *Placusa atrata* | ?P | ffc | 37 | 2 |  | 2 | 4 | 5 | 50 |
| *Placusa depressa* | ?P |  |  |  |  | 2 | 1 |  | 3 |
| *Plegaderus vulneratus* | P |  | 7 |  |  | 2 | 1 | 4 | 14 |
| *Podistra rufotestacea* | ?P |  |  | 2 | 4 | 1 |  | 4 | 11 |
| *Podistra schoenherri* | P |  | 4 | 8 | 8 | 11 | 10 | 8 | 49 |
| *Pogonocherus decoratus* | C,W |  | 2 |  |  |  |  | 1 | 3 |
| *Pogonocherus fasciculatus* | C,W |  | 2 |  | 1 |  | 1 |  | 4 |
| *Polygraphus poligraphus* | C |  | 431 | 6 | 5 | 1 | 35 | 2 | 480 |
| *Polygraphus punctifrons* | C |  | 29 | 34 | 16 | 16 | 16 | 17 | 128 |
| *Polygraphus subopacus* | C |  | 6 | 4 | 4 | 6 | 1 | 1 | 22 |
| *Protaetia metallica* | D |  |  |  |  |  |  | 2 | 2 |
| *Proteinus brachypterus* | ?P |  |  |  |  | 1 | 2 | 5 | 8 |
| *Pteryngium crenatum* | F |  |  | 1 |  | 3 | 1 | 1 | 6 |
| *Pteryx suturalis* | F |  | 3 | 56 | 91 | 82 | 24 | 68 | 324 |
| *Ptinella johnsoni* | F |  |  |  |  |  |  | 1 | 1 |
| *Ptinella limbata* | F |  |  | 1 |  |  |  |  | 1 |
| *Ptinus subpillosus* | C |  |  |  |  | 1 |  |  | 1 |
| *Pytho depressus* | C |  |  |  |  | 1 |  |  | 1 |
| *Quedius cruentus* | ?P |  |  |  | 2 |  | 2 |  | 4 |
| *Quedius lundbergi* (NT) | ?P |  | 1 |  | 6 |  |  |  | 7 |
| *Quedius mesomelinus* | ?P |  |  |  | 1 | 1 | 5 | 2 | 9 |
| *Quedius microps* | W |  |  |  |  |  | 3 |  | 3 |
| *Quedius plagiatus* | P |  | 1 | 12 | 6 | 15 | 5 | 18 | 57 |
| *Quedius tenellus* | ?P |  | 2 | 4 | 14 | 9 | 2 | 1 | 32 |
| *Quedius xanthopus* | ?P |  |  |  | 1 | 1 |  | 1 | 3 |
| *Rabocerus foveolatus* | P |  |  |  |  |  |  | 1 | 1 |
| *Rhagium inquisitor* | C,W | ffc |  |  |  |  |  | 1 | 1 |
| *Rhagium mordax* | C |  |  | 1 | 1 |  |  |  | 2 |
| *Rhizophagus dispar* | P |  | 1 | 5 | 6 | 10 | 4 | 11 | 37 |
| *Rhizophagus fenestralis* | P |  | 24 | 10 | 9 | 20 | 25 | 54 | 142 |
| *Rhizophagus ferrugineus* | P |  | 7 | 1 | 1 | 5 | 6 | 6 | 26 |
| *Rhizophagus nitidulus* | P |  | 2 | 6 |  | 4 |  | 3 | 15 |
| *Rhopalodontus strandi* | F |  |  | 1 |  | 4 |  |  | 5 |
| *Rhyncolus ater* | W |  |  |  |  | 1 |  | 1 | 2 |
| *Rhyncolus sculpturatus* | W |  |  |  | 3 | 9 | 2 | 2 | 16 |
| *Rusticoclytus rusticus* | C,W |  | 1 |  |  |  |  |  | 1 |
| *Salpingus ruficollis* | P |  | 2 | 2 |  | 1 |  | 1 | 6 |
| *Scaphisoma agaricinum* | ?F |  | 25 | 15 | 17 | 50 | 5 | 37 | 149 |
| *Scaphisoma subalpinum*(NT) | ?F |  | 5 | 1 | 1 | 3 |  |  | 10 |
| *Scolytus ratzeburgii* | C |  | 25 |  |  |  | 1 |  | 26 |
| *Scydmaenus hellwigii* | P |  |  |  |  | 1 |  |  | 1 |
| *Sepedophilus constans* | F |  | 1 |  |  | 1 |  |  | 2 |
| *Sepedophilus littoreus* | F |  | 20 | 23 | 2 | 3 | 19 | 4 | 71 |
| *Sepedophilus marshami* | F |  |  |  |  | 1 | 1 |  | 2 |
| *Sepedophilus testaceus* | F |  | 1 | 1 |  |  |  | 2 | 4 |
| *Sericoda quadripunctata* | P | fd | 1 |  |  |  |  |  | 1 |
| *Silvanoprus fagi* | ?P |  | 1 |  |  |  | 1 |  | 2 |
| *Soronia grisea* | D |  |  |  |  |  |  | 1 | 1 |
| *Sphaeriestes stockmanni* | P | fd | 38 |  | 1 |  |  |  | 39 |
| *Sphindus dubius* | F |  | 2 |  |  |  | 1 | 1 | 4 |
| *Stenichnus bicolor* | P |  | 1 | 19 | 12 | 9 | 6 | 20 | 67 |
| *Stenotrachelus aeneus* | C,W | fd | 6 |  |  |  | 1 |  | 7 |
| *Stenurella melanura* | W |  |  | 1 |  |  |  | 1 | 2 |
| *Stephostethus rugicollis* | F |  | 8 | 3 | 1 | 1 | 5 | 3 | 21 |
| *Sulcacis fronticornis* | F |  |  |  |  |  |  | 1 | 1 |
| *Syntomium aeneum* | ?P |  |  | 2 |  |  | 1 | 1 | 4 |
| *Tachyta nana* | P | ffc | 1 |  |  |  |  |  | 1 |
| *Tetratoma ancora* | F |  | 1 | 4 | 2 |  |  | 3 | 10 |
| *Tetropium castaneum* | C |  | 2 |  |  |  | 1 | 1 | 4 |
| *Tetropium fuscum* | C |  |  | 1 |  |  |  |  | 1 |
| *Thanasimus formicarius* | P |  |  |  |  |  |  | 1 | 1 |
| *Thiasophila wockii* | ?P |  | 3 |  | 4 |  | 2 | 1 | 10 |
| *Trichophya pilicornis* | ?F |  | 5 |  |  |  | 5 |  | 10 |
| *Triplax aenea* | F |  | 5 | 7 | 3 | 3 | 4 | 8 | 30 |
| *Triplax russica* | F |  | 6 | 28 | 8 | 50 | 11 | 34 | 137 |
| *Triplax scutellaris* | F |  | 5 | 43 | 24 | 42 | 19 | 42 | 175 |
| *Trypodendron laeve* | F |  |  |  |  |  | 1 |  | 1 |
| *Trypodendron lineatum* | F |  | 31 | 6 | 3 | 2 | 14 | 1 | 57 |
| *Trypodendron signatum* | F |  | 13 | 30 | 20 | 4 | 56 | 11 | 134 |
| *Tyrus mucronatus* | ?F |  | 3 |  |  |  |  |  | 3 |
| *Wanachia triguttata* | F | ffc | 1 |  |  |  | 1 | 5 | 7 |
| *Xylechinus pilosus* | C |  |  | 2 |  | 9 |  | 2 | 13 |
| *Xylita laevigata* | F |  |  | 14 | 11 | 33 | 2 | 24 | 84 |
| **Grand Total** |  |  | **4999** | **2106** | **1083** | **2413** | **1484** | **3015** | **15100** |
